# Supplementary material for: Decoupling photo- and thermoperiod by projected climate change perturbs bud development, dormancy establishment and vernalization in the model tree Populus
Source: PubMed Central journal article supplement (PMC6173867; doi:10.1186/s12870-018-1432-0), 2018-10-05
Supplement: 12870_2018_1432_MOESM1_ESM.pdf [file 12870_2018_1432_MOESM1_ESM.pdf]

## Additional file 1: Table S1

**Additional file 1: Table S1.** Bud scale-initiation date calculated from the internode-leaf units that emerged before the TB was formed. Days were deduced from the plastochron.

| Number of plants | TB scale initiation date | Temperature (day/night) |
|------------------|--------------------------|-------------------------|
| 22               | 0/21,5*                  | 24/24°C                 |
| 19               | 0,4                      | 18/18°C                 |
| 23               | -1,2                     | 18/12°C                 |
| 21               | -4,1                     | 12/12°C                 |

\*Two dates due to flushing

## Additional file 1: Figure S1

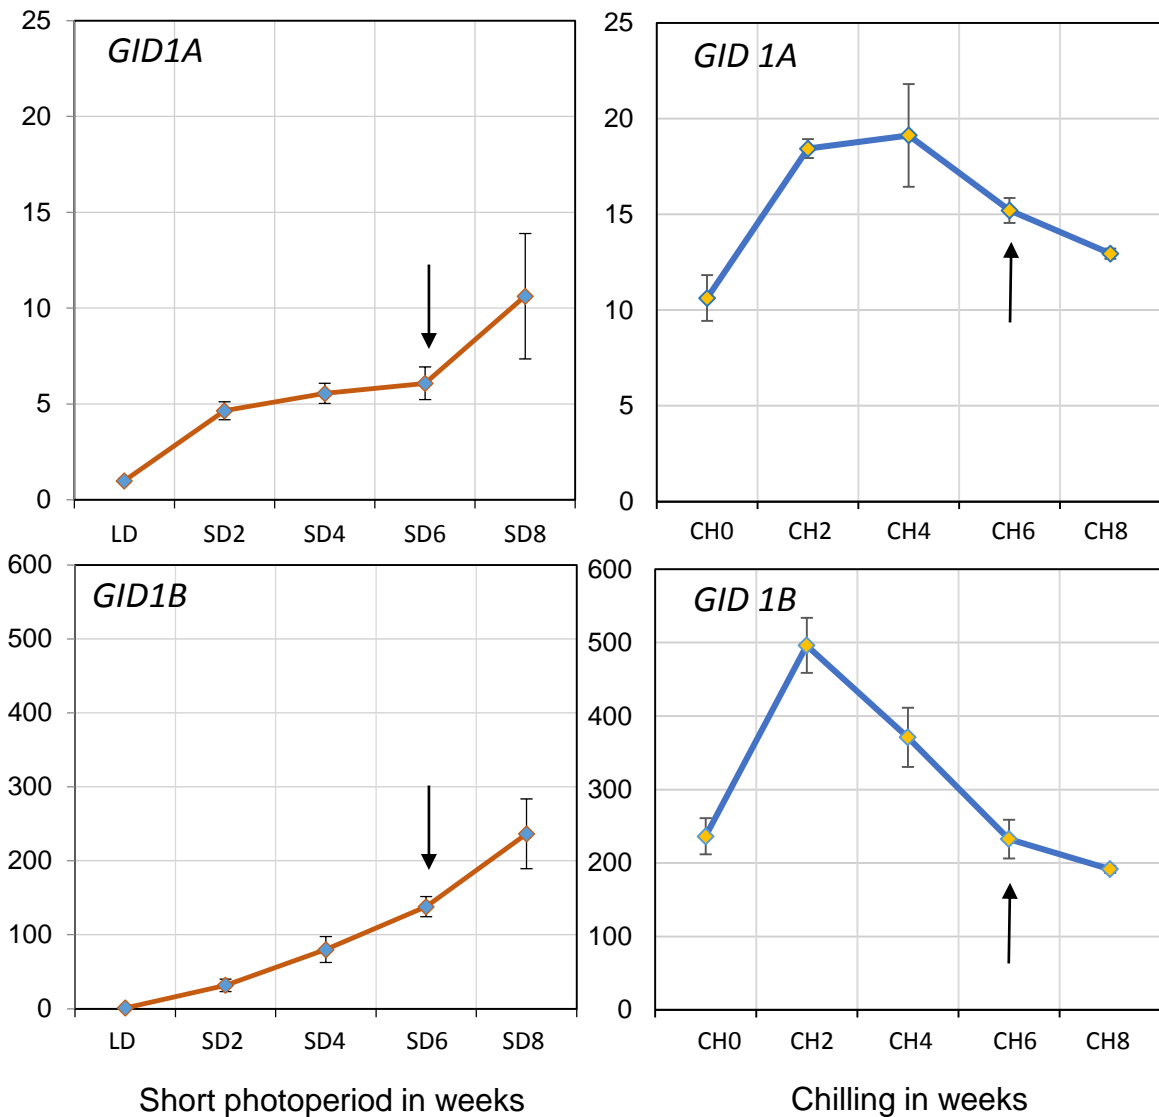

**Additional file 1: Figure S1.** Expression of gibberellin receptor, *GID1A* and *GID1B* during dormancy establishment under short photoperiod and subsequent dormancy removal by chilling. Expression is presented as fold changes using long day value as reference (=1). Plants were first kept for 8 weeks under short photoperiod (SD0-SD8) and subsequently chilled for 8 weeks (CH0-CH8) to remove dormancy. The end of short photoperiod treatment (SD8) is comparable to the beginning of chilling treatment (CH0). The approximate timing of dormancy establishment and dormancy removal in the given conditions are indicated by arrows. (values are means  $\pm$  SE, n=6)

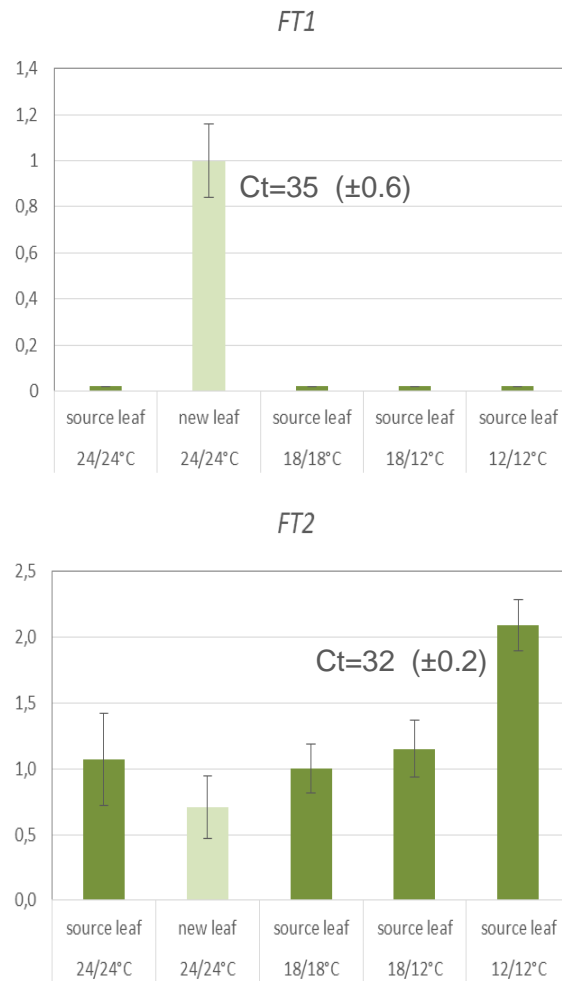

**Additional file 1: Figure S2.** Expression of *FT1* and *FT2* in leaves under short photoperiod and at different temperature regimes. Plants were exposed to either high (24/24°C), moderate (18/18°C), moderate/low (18/12°C) and low (12/12°C) temperature conditions for six weeks. Expression was analysed in source leaves at all temperature combinations, and in the new leaves that unfolded after flushing at high ambient temperature (24/24°C). Highest Ct values for *FT1* and *FT2* indicated. (values are means  $\pm$  SE, n=6)

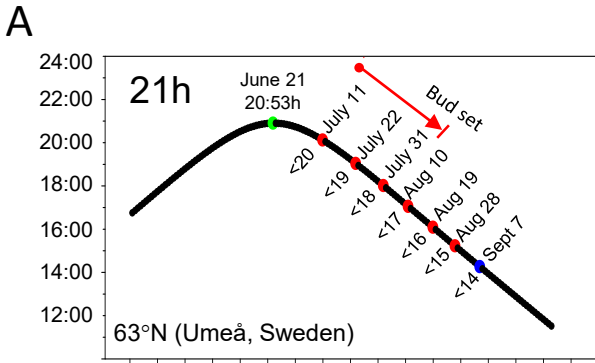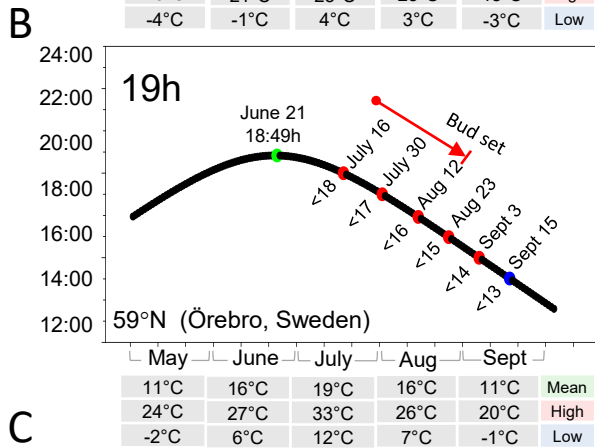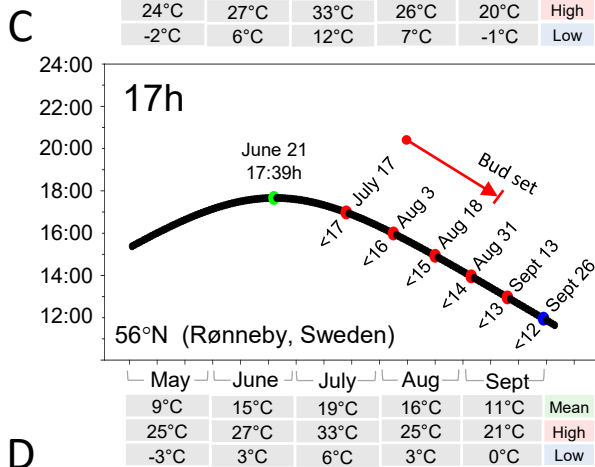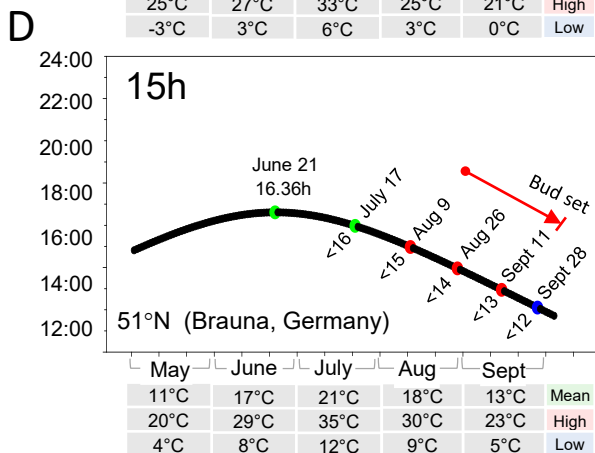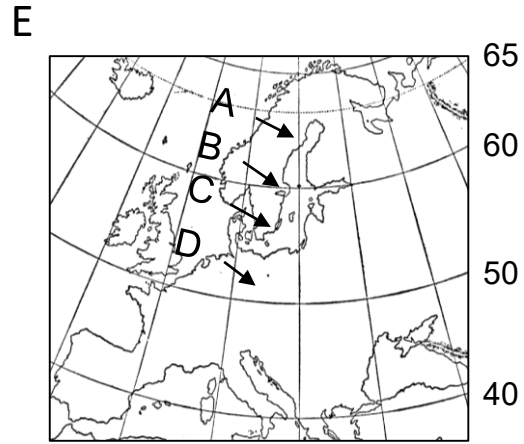

**Additional file 1. Figure S3.** Photo- and thermoperiods of four European aspen ecotypes at their native locations. (A-D) Scatter plots (black line) indicate the length of the daily photoperiod, from 1 May to 31 September. The mean monthly temperatures are presented in the table below the plot, including absolute maximum and minimum of the given month, exemplified for the year 2010. The longest day, 21 June, is indicated by a green dot. The timing of bud burst varies dependent on latitude, but at summer solstice the trees are actively growing at all locations. The first red dot indicates the date at which the days are clearly shorter ( $<$ ) than the critical photoperiod of a given ecotype (data from [25]). Subsequent red dots indicate photoperiods that are shorter than the indicated number of hours. Once the short photoperiod is perceived, the formation of complete buds takes approx. 4 weeks [28]. Approximate timing of bud formation is indicated by a red arrow. A blue dot indicates the approximate onset of low temperatures, although sporadically temperatures can drop also during the warm season. (E) Coordinates of the four latitudes (provenances).

## Additional file 1: Table S2

**Additional file 1: Table S2.** Genes, model identifiers, and primer pairs for qRT-PCR.

| Protein                                                  | Gene                     | Populus trichocarpa v3.0 | Primers                 |                            |
|----------------------------------------------------------|--------------------------|--------------------------|-------------------------|----------------------------|
|                                                          |                          | Locus name               | Forward 5'-3'           | Reverse 5'-3'              |
| beta-1,3-glucanase                                       | <i>GH17_33</i>           | Potri.001G449100         | CAATGCGTATCCCTTTTTCG    | GGAAGTTGCTTTTCGGATCA       |
| beta-1,3-glucanase                                       | <i>GH17_44</i>           | Potri.010G142800         | TGCATTCTCCCGAATAAAC     | GGAAACTGTCGCGTTTTGTT       |
| beta-1,3-glucanase                                       | <i>GH17_101</i>          | Potri.016G057600         | AGAGAGGAACCCCAAGAAG     | AGAAAGATCCCCCAATGTTT       |
| beta-1,3-glucanase                                       | <i>GH17_102</i>          | Potri.001G006500         | TGCCATGAACTACCTCCACA    | GGAAAGCCTTGGGATAATG        |
| GA3 oxidase 1                                            | <i>GA3ox1</i>            | Potri.001G176600         | TGGCTCTCCTCTTGAGCATT    | AACCATGTCAACCTCCTTGC       |
| GA 20 oxidase 8                                          | <i>GA20ox8</i>           | Potri.015G134600         | ATCAAAACCATGCCATCCA     | TGGTGTGGAAGAACTTGTGC       |
| GA2 oxidase 1                                            | <i>GA2ox1</i>            | Potri.001G378400         | TTCTTCTCATTACCGCTCTCTG  | TCTACCCAGCCCACATCAC        |
| GIBBERELLIN INSENSITIVE DWARF1                           | <i>GID1A</i>             | Potri.005G040600         | ACCGTGGGACTAGCCTTCTT    | ACAACCTCCGAGTTGACAGG       |
| FLOWERING LOCUS T                                        | <i>FT1</i>               | Potri.008G077700         | GCGAGCTCAAGCCTCTCA      | TGCATCAGGGTCCACCATAAC      |
| FLOWERING LOCUS T                                        | <i>FT2</i>               | Potri.010G179700         | GAGGTTGTGTGCTACGAGAGC   | CACTGTTTGCCTGCCTAGTTG      |
| CENTRORADIALIS-LIKE1                                     | <i>CENL1</i>             | Potri.004G203900         | AGTCCAACAGGAAGCAGGTTTTT | AAAGGATCTCATATCACCTCCATGAA |
| CONSTANS                                                 | <i>CO</i>                | Potri.004G108300         | GATGTTGGAGTGGTGCCAGAA   | TGGATAGCAGTGCTGGAGAAAAG    |
| APETALA1                                                 | <i>AP1</i>               | Potri.008G098500         | TCAGTTACCAGGAAGAAGATCCA | TTCATGTTCAAAGCATCCA        |
| SUPPRESSOR OF OVEREXPRESSION OF CONSTANS1/AGL-14-related | <i>SOC1/AG14-related</i> | Potri.003G119700         | AGTGTGGGATGCAACAACCT    | TCTTATGGTTTTGGGGCAAG       |
| LEAFY                                                    | <i>LFY</i>               | Potri.015G106900         | ATGCCCACTAAGGTGACAA     | AAGTGCCTTAGATGCGTCTT       |
| MORE AXILLARY BRANCHES1                                  | <i>MAX1.1</i>            | Potri.006G226700         | AAACGTTATGGCCCCATTTT    | TGAGATGGGAGAGGGAACAC       |
| BRANCHED1                                                | <i>BRC1-LIKE</i>         | Potri.012G059900         | CATCATCGCGTAAAACCTCA    | GTCGATTCTCGACTGCACA        |
| ACTIN                                                    | <i>ACT</i>               | Potri.001G309500         | CGATGCCGAGGATATTCAAC    | ACCAGTGTGCTTGGTCTACCC      |
